# Supplementary material for: Longitudinal Distribution Map of the Active Components and Endophytic Fungi in Angelica sinensis (Oliv.) Diels Root and Their Potential Correlations
Source: MDPI journal article supplement (doi:10.3390/metabo14010048), 2024-01-12
Supplement: s1 [file s1]

## Supplementary data

# Longitudinal Distribution Map of the Active Components and Endophytic Fungi in *Angelica sinensis* (Oliv.) Diels Root and Their Potential Correlations

Ying Sun <sup>1,†</sup>, Rong Guo <sup>2,†</sup>, Yuting Geng <sup>3,†</sup>, Hushan Shang <sup>4</sup>, Xiaopeng Guo <sup>1,2,\*</sup>, Yue Wu <sup>1</sup>, Yonggang Wang <sup>2,\*</sup>, Li Li <sup>1</sup>, Xue Li <sup>2</sup>, Shengli Zhang <sup>2</sup>, Ning Xu <sup>1</sup> and Xueyan Li <sup>2</sup>

<sup>1</sup> Gansu Institute for Drug Control, Lanzhou 730070, China

<sup>2</sup> School of Life Science and Engineering, Lanzhou University of Technology, Lanzhou 730050, China

<sup>3</sup> Department of Water Resources of Gansu Province, Lanzhou 730020, China

<sup>4</sup> Dingxi Academy of Agricultural Sciences, Dingxi 743002, China

\* Correspondence: guoxp@lut.edu.cn (X.G.); wangyg@lut.edu.cn (Y.W.); Tel.: +86-15101200201 (X.G.); +86-13679492830 (Y.W.)

† These authors contributed equally to this work.

## Supplementary data

**Tab. S1** Classification of the Ang root metabolites identified using untargeted metabolomics, including metabolites obtained from positive and negative ion modes.

| SuperClass                   | HMDB taxonomy              | Metabolites number |     |       |
|------------------------------|----------------------------|--------------------|-----|-------|
|                              |                            | Pos                | Neg | Total |
| Organoheterocyclic compounds | Heteroaromatic compounds   | 21                 | 12  | 33    |
|                              | Indoles and derivatives    | 13                 | 15  | 28    |
|                              | Pteridines and derivatives | 15                 | 11  | 26    |
|                              | Isocoumarans               | 23                 | 0   | 23    |
|                              | Pyridines and derivatives  | 20                 | 3   | 23    |
|                              | Biotin and derivatives     | 22                 | 0   | 22    |
|                              | Imidazodiazepines          | 19                 | 0   | 19    |
|                              | Pyrrolizidines             | 18                 | 0   | 18    |
|                              | Benzopyrans                | 17                 | 0   | 17    |
|                              | Dihydrofurans              | 0                  | 17  | 17    |
|                              | Furofurans                 | 0                  | 16  | 16    |

|                                         |                                     |    |    |    |
|-----------------------------------------|-------------------------------------|----|----|----|
|                                         | Lactams                             | 14 | 0  | 14 |
|                                         | Imidazopyrimidines                  | 6  | 4  | 10 |
|                                         | Quinolines and derivatives          | 0  | 7  | 7  |
|                                         | Benzofurans                         | 4  | 0  | 4  |
|                                         | Benzodioxoles                       | 3  | 0  | 3  |
|                                         | Furans                              | 0  | 2  | 2  |
|                                         | Oxazinanes                          | 2  | 0  | 2  |
|                                         | Diazinanes                          | 1  | 0  | 1  |
|                                         | Lactones                            | 0  | 1  | 1  |
| Lipids and lipid-like molecules         | Steroids and steroid derivatives    | 60 | 22 | 82 |
|                                         | Glycerolipids                       | 37 | 26 | 63 |
|                                         | Prenol lipids                       | 51 | 0  | 51 |
|                                         | Fatty Acyls                         | 33 | 16 | 49 |
|                                         | Sphingolipids                       | 0  | 27 | 27 |
|                                         | Glycerophospholipids                | 14 | 0  | 14 |
| Organic acids and derivatives           | Carboxylic acids and derivatives    | 34 | 34 | 68 |
|                                         | Hydroxy acids and derivatives       | 35 | 2  | 37 |
|                                         | lives                               | 0  | 36 | 36 |
|                                         | Keto acids and derivatives          | 0  | 35 | 35 |
| Benzenoids                              | Benzene and substituted derivatives | 25 | 4  | 29 |
|                                         | Phenol ethers                       | 28 | 0  | 28 |
|                                         | Indanes                             | 27 | 0  | 27 |
|                                         | Phenol esters                       | 26 | 0  | 26 |
|                                         | Naphthalenes                        | 10 | 8  | 18 |
|                                         | Phenols                             | 6  | 7  | 13 |
|                                         | Anthracenes                         | 0  | 9  | 9  |
| Phenylpropanoids and polyketides        | Coumarins and derivatives           | 16 | 4  | 20 |
|                                         | Kavalactones                        | 17 | 0  | 17 |
|                                         | Cinnamic acids and derivatives      | 7  | 9  | 16 |
|                                         | Isoflavonoids                       | 15 | 0  | 15 |
|                                         | Phenylpropanoic acids               | 14 | 0  | 14 |
|                                         | Cinnamyl alcohols                   | 0  | 11 | 11 |
|                                         | Cinnamaldehydes                     | 9  | 1  | 10 |
|                                         | Flavonoids                          | 0  | 10 | 10 |
|                                         | Macrolides and analogues            | 0  | 2  | 2  |
| Nucleosides, nucleotides, and analogues | Pyrimidine nucleosides              | 8  | 7  | 15 |
|                                         | 5'-deoxyribonucleosides             | 0  | 8  | 8  |
|                                         | Purine nucleosides                  | 4  | 4  | 8  |
|                                         | Pyrimidine nucleotides              | 5  | 0  | 5  |
|                                         | Pyridine nucleotides                | 3  | 0  | 3  |
|                                         | Purine nucleotides                  | 2  | 0  | 2  |
|                                         | Ribonucleoside 3'-phosphates        | 1  | 0  | 1  |
| Organic oxygen compounds                | Organooxygen compounds              | 15 | 17 | 32 |
| Organic nitrogen compounds              | Organonitrogen compounds            | 7  | 0  | 7  |
| Homogeneous non-metal compounds         | Non-metal oxoanionic compounds      | 1  | 1  | 2  |
| Alkaloids and derivatives               | Ergoline and derivatives            | 1  | 0  | 1  |

|                                           |                  |   |   |   |
|-------------------------------------------|------------------|---|---|---|
| Lignans, neolignans and related compounds | Furanoid lignans | 1 | 0 | 1 |
|-------------------------------------------|------------------|---|---|---|

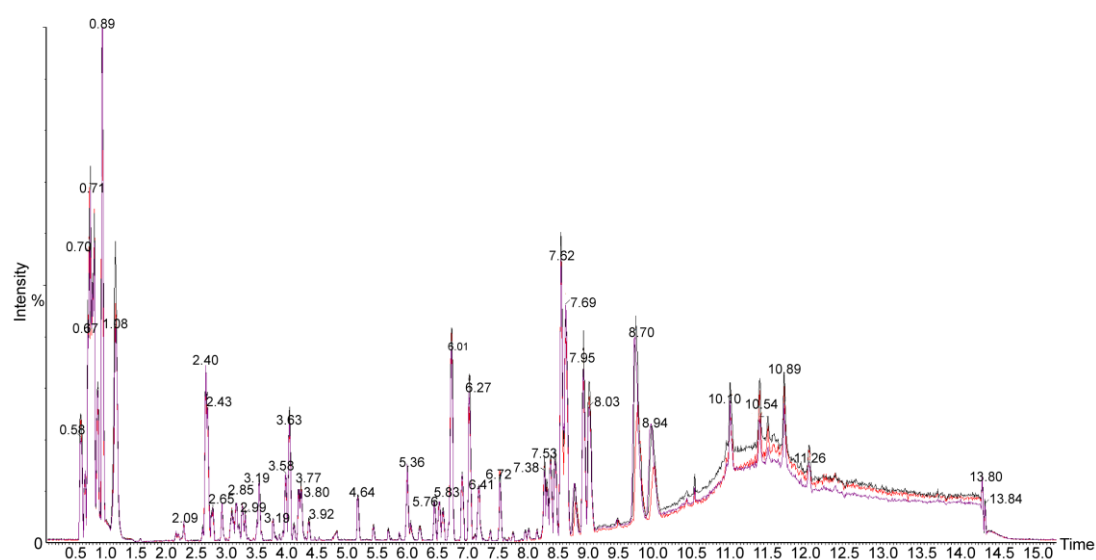

**Fig. S1** Peaks of all QC sample outputs determined using the LC-MS system (negative ion mode) almost overlap, indicating the stability of the system.

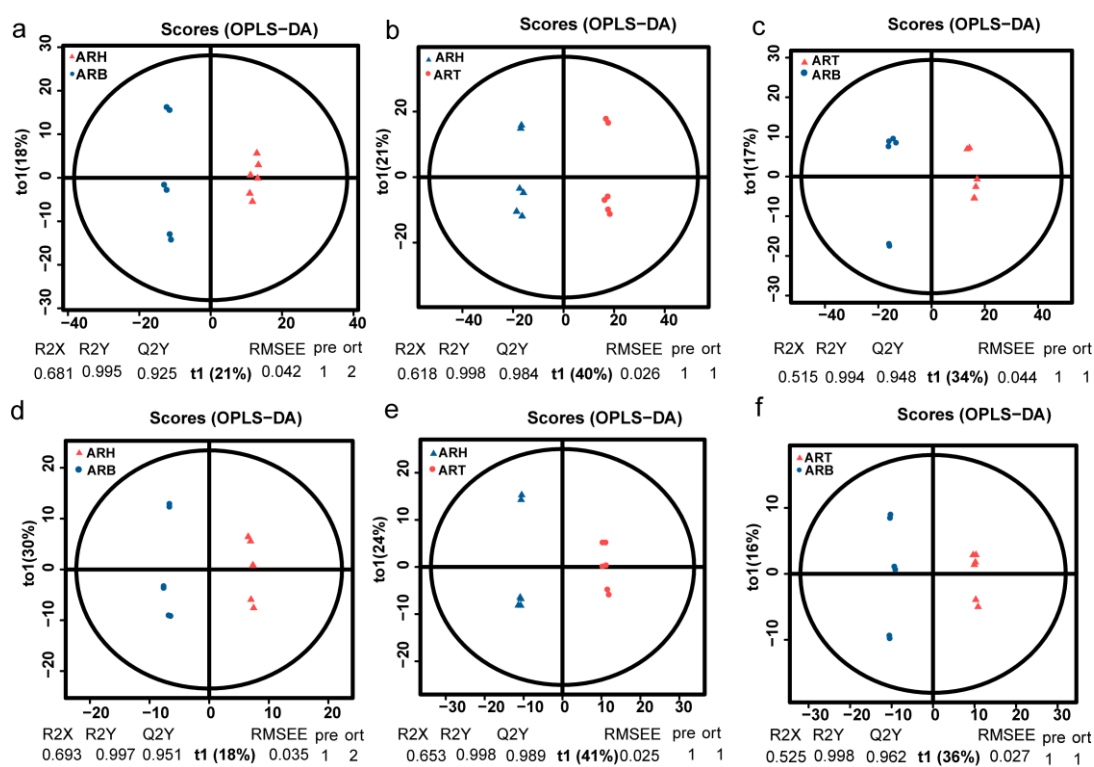

**Fig. S2** OPLS-DA for the samples from different medicinal parts based on metabolite abundance data. Fitting results of the discriminant model according to the metabolites identified in the positive ion mode (a, b, and c), and the negative ion mode (d, e, and f).

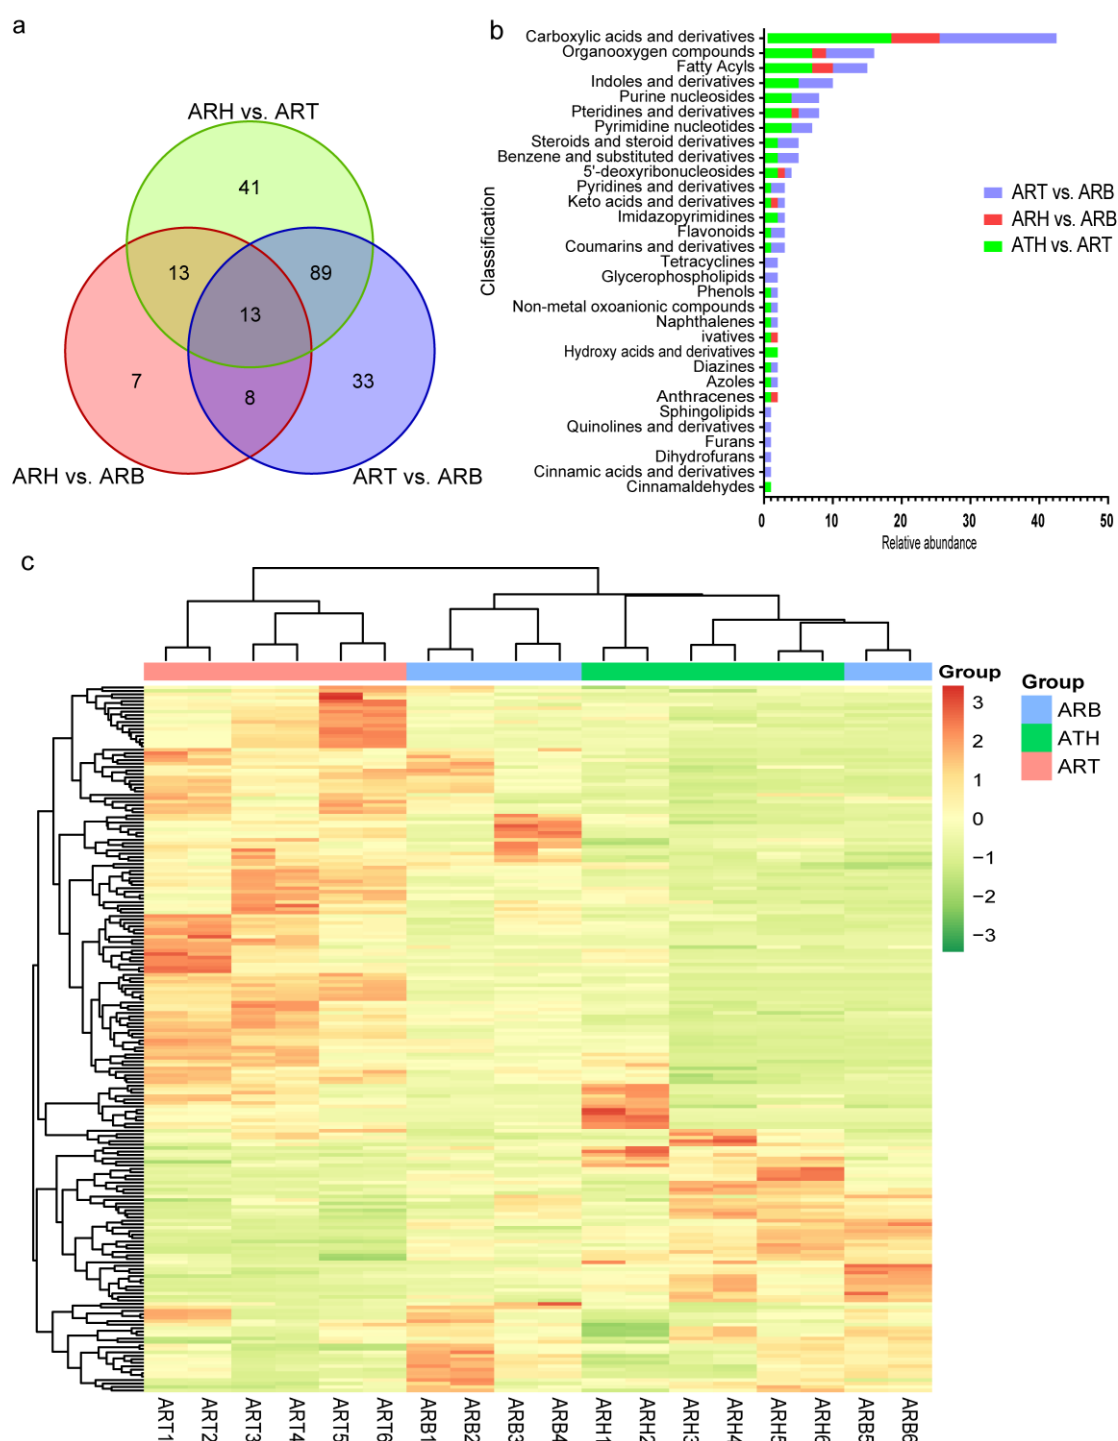

**Fig. S3** Analysis of the differential metabolites between pairs of medicinal parts in Ang root (ARH vs. ART, ARH vs. ARB, and ART vs. ARB) under a negative ion mode. a, Venn diagram showing the differential metabolites obtained by pairwise comparison; b, categorical distributions of the differential metabolites in the pairwise comparisons; c, hierarchical clustering of samples from different medicinal parts based on the abundance data for the differential metabolites.

**Tab. S2** The most up- and down-regulated metabolites between medicinal parts of Ang root (ARH vs. ART) in the negative ion mode and their efficacy annotations based on published literature and existing databases.

| Metabolites                       | log <sub>2</sub> FC | P           | VIP         | Efficacies |
|-----------------------------------|---------------------|-------------|-------------|------------|
| Up-regulated in ART               |                     |             |             |            |
| (±)7-epi Jasmonic Acid            | 24.05605131         | 0.01933689  | 1.114826215 | O/U        |
| Levofloxacin                      | 21.120608           | 0.010691571 | 1.189012861 | D          |
| Naringenin-7-O-Glucoside          | 20.97447691         | 0.026300213 | 1.108350735 | A&J&K      |
| Procyanidin C1                    | 20.43911118         | 0.035547733 | 1.082350051 | K          |
| (E)-2-Butenyl-4-methyl-threo-nine | 20.35408852         | 0.00336545  | 1.330190291 | O/U        |
| Zidovudine                        | 18.52287241         | 0.000328323 | 1.473882235 | L          |
| Sappanone A Dimethyl Ether        | 18.37546152         | 3.22997E-07 | 1.544781928 | E&I&K      |
| Genkwanin                         | 18.01104845         | 0.005347421 | 1.277507851 | E          |
| D-Quinovose                       | 17.37229918         | 0.009625896 | 1.256741666 | E&J        |
| Compactin                         | 17.30075744         | 0.009613316 | 1.233847214 | A&D        |
| Up-regulated in ARH               |                     |             |             |            |
| L-Citrulline                      | 17.06407765         | 0.021322857 | 1.136057815 | B          |
| Oleandrin                         | 16.23242615         | 0.001554801 | 1.395790335 | J&L        |
| Hygromycin B                      | 15.77239257         | 0.013552818 | 1.151534867 | D          |
| Salannin                          | 11.1168727          | 0.040288286 | 1.016505585 | D&J&L      |
| Androsterone sulfate              | 11.02829728         | 6.04545E-07 | 1.530880806 | H          |
| D-Glycerate 2-phosphate           | 10.94182852         | 5.20276E-05 | 1.499242064 | O/U        |
| (±)Abscisic Acid                  | 7.921034323         | 0.008287957 | 1.252012849 | O/U        |
| Manumycin A                       | 7.068500558         | 0.007207878 | 1.270556307 | D&J        |
| Glutathione, oxidized             | 5.925103791         | 0.000430685 | 1.468147424 | K          |
| L-Lysine monohydrochloride        | 2.882769875         | 0.00109482  | 1.408420762 | B&C        |

Note: The Capital letters represent the efficacy items of metabolites, which are as follows: A, Hemodynamic improvement; B, Efficient nutritional supplement; C, Hemostasis; D, Antibacterial; E, Anti-inflammatory; F, Short peptide-based regulation; G, Hepatoprotection; H, Hormone regulation; I, Neuromodulation, neuroprotection and tranquilization; J, Anti-tumor; K, Antioxidation; L, Antiviral. The 'O/U' was used to indicate other or unclear efficacies.

**Tab. S3** The most up- and down-regulated metabolites between medicinal parts of Ang root (ARB vs. ART) in the positive and negative ion mode and their efficacy annotations based on published literature and existing databases.

| Metabolites                                                 | log <sub>2</sub> FC | <i>P</i> | VIP      | Efficacies |
|-------------------------------------------------------------|---------------------|----------|----------|------------|
| Up-regulated in ART (positive ion mode)                     |                     |          |          |            |
| 20-hydroxy-PGF2a                                            | 25.418283           | 0.017170 | 1.327444 | A          |
| Isoleucyl-Histidine                                         | 21.614999           | 0.009634 | 1.366361 | B&F        |
| Corchorusoside E                                            | 20.759734           | 0.001139 | 1.509182 | A          |
| Ile Val Val Phe                                             | 19.419996           | 0.008975 | 1.248720 | B&F        |
| 6-pentadecyl Salicylic Acid                                 | 19.109225           | 0.012289 | 1.351436 | A&D        |
| pos_7956 (potential structural analogues of corticosterone) | 18.890987           | 0.000355 | 1.565330 | H          |
| Echinacoside                                                | 15.990446           | 0.049407 | 1.063720 | E&I&K      |
| His His Arg Lys                                             | 15.350677           | 0.000551 | 1.448035 | B&F        |
| Mitomycin                                                   | 15.288801           | 0.013661 | 1.319412 | J          |
| Thapsigargin                                                | 15.211655           | 0.003325 | 1.407567 | E&J        |
| Up-regulated in ART (negative ion mode)                     |                     |          |          |            |
| Gentiobiose                                                 | 23.654271           | 0.034234 | 1.101296 | O/U        |
| Genkwanin                                                   | 20.774493           | 0.005498 | 1.354924 | E          |
| Gln Asn Glu Glu                                             | 19.224167           | 0.025391 | 1.145099 | B&F        |
| Flavin mononucleotide (FMN)                                 | 17.964504           | 0.023795 | 1.171169 | O/U        |
| 2-Ethyl-4-hydroxy-5-methyl-3(2H)-furanone                   | 14.916657           | 0.042682 | 1.057640 | O/U        |
| Glutamine                                                   | 14.837699           | 0.028751 | 1.121713 | E          |
| Levofloxacin                                                | 14.113105           | 0.011600 | 1.264487 | D          |
| 2'-O-methylguanosine                                        | 13.583382           | 0.000001 | 1.626394 | O/U        |
| 7-Methylguanosine                                           | 12.575918           | 0.001684 | 1.318273 | O/U        |
| Tetracycline                                                | 11.878423           | 0.006361 | 1.337141 | O/U        |
| Up-regulated in ARB (positive ion mode)                     |                     |          |          |            |
| Virginiamycin S1                                            | 23.864641           | 0.019134 | 1.230527 | D          |
| 2'-O-methylcytidine                                         | 18.318932           | 0.000218 | 1.604279 | O/U        |
| L-alpha-Glutamyl-L-tyrosine                                 | 11.076554           | 0.012707 | 1.291315 | B&F&I      |
| Tryptamine                                                  | 7.249718            | 0.005405 | 1.406326 | C&I        |

|                                         |           |          |          |       |
|-----------------------------------------|-----------|----------|----------|-------|
| Nalpa-Methylhistidine                   | 6.446779  | 0.023545 | 1.136743 | O/U   |
| DL-Arginine                             | 4.304115  | 0.003394 | 1.455654 | B&C&G |
| DL-Benzylsuccinic acid                  | 3.959036  | 0.012056 | 1.353680 | O/U   |
| Lys Ser Gly                             | 3.762833  | 0.009348 | 1.346463 | B&F   |
| Homatropine                             | 3.275559  | 0.002159 | 1.481089 | O/U   |
| L-Arginine                              | 3.089285  | 0.000000 | 1.659133 | B&C&G |
| Up-regulated in ARB (negative ion mode) |           |          |          |       |
| L-Citrulline                            | 18.047198 | 0.008253 | 1.336018 | B     |
| D-Glycerate 2-phosphate                 | 10.027066 | 0.001245 | 1.445770 | O/U   |
| Salannin                                | 8.560896  | 0.043717 | 1.066953 | D     |
| (±)Absciscic Acid                       | 6.152383  | 0.008421 | 1.275040 | O/U   |
| Homogentisic acid                       | 5.954816  | 0.004510 | 1.295302 | O/U   |
| 2,5-Dihydroxybenzoic acid               | 2.377378  | 0.006804 | 1.321143 | O/U   |
| Nicotinamide adenine dinucleotide (NAD) | 2.338834  | 0.018263 | 1.210123 | O/U   |
| L-Lysine monohydrochloride              | 2.247586  | 0.034353 | 1.141402 | B&C   |
| 17-Octadecynoic Acid                    | 1.629519  | 0.025034 | 1.184805 | O/U   |
| N-Acetyl-D-lactosamine                  | 1.569557  | 0.007832 | 1.324301 | O/U   |

Note: The Capital letters represent the efficacy items of metabolites, which are as follows: A, Hemodynamic improvement; B, Efficient nutritional supplement; C, Hemostasis; D, Antibacterial;E, Anti-inflammatory; F, Short peptide-based regulation; G, Hepatoprotection; H, Hormone regulation; I, Neuromodulation, neuroprotection and tranquilization; J, Anti-tumor; K, Antioxidation; L, Antiviral. The ‘O/U’ was used to indicate other or unclear efficacies.

**Tab. S4** The most up- and down-regulated metabolites between medicinal parts of Ang root (ARH vs. ARB) in the positive and negative ion mode and their efficacy annotations based on published literature and existing databases.

| Metabolites                             | log <sub>2</sub> FC | P        | VIP      | Efficacies |
|-----------------------------------------|---------------------|----------|----------|------------|
| Up-regulated in ARB (positive ion mode) |                     |          |          |            |
| β-estradiol                             | 17.314592           | 0.045989 | 1.310739 | B&H        |
| 11-Deoxy-17-hydroxycorticosterone       | 15.664763           | 0.046827 | 1.370235 | B&H        |
| Erybraedin B                            | 15.133892           | 0.024654 | 1.442352 | J          |
| Gly Ile Lys Arg                         | 14.278889           | 0.013917 | 1.592609 | B&F        |
| 1,2,4,5-Tetramethylbenzene              | 10.343807           | 0.000113 | 2.056331 | O/U        |
| Gly Asn Gly                             | 9.492815            | 0.017614 | 1.604716 | B&F        |



|                                             |           |          |          |             |
|---------------------------------------------|-----------|----------|----------|-------------|
| 3-Thiatetradecanoic Acid                    | 9.344582  | 0.036947 | 1.440843 | O/U         |
| Ser Val Lys Lys                             | 8.143120  | 0.000665 | 1.987946 | B&F         |
| Ramipril                                    | 6.575434  | 0.000029 | 2.029121 | A           |
| PGD3                                        | 6.149392  | 0.020497 | 1.555526 | O/U         |
| Up-regulated in ARB (negative ion mode)     |           |          |          |             |
| (±)7-epi Jasmonic Acid                      | 13.576486 | 0.030674 | 1.658267 | O/U         |
| Naringenin-7-O-Glucoside                    | 13.442634 | 0.029282 | 1.556087 | A&D&E&J&K   |
| glutamyl-Asparagine                         | 8.923301  | 0.030204 | 1.597819 | B&F         |
| Methyl Orsellinate                          | 8.783322  | 0.046797 | 1.460511 | D           |
| Cyclic adenosine diphosphate ribose         | 8.615745  | 0.014263 | 1.691554 | O/U         |
| Alanyl-Tyrosine                             | 8.067716  | 0.033856 | 1.457185 | B&F         |
| Lysyl-Proline                               | 5.940672  | 0.001153 | 1.889881 | B&F         |
| Leucyl-Glutamate                            | 4.977532  | 0.010633 | 1.744985 | B&F         |
| (+)-Citramalic acid                         | 4.555716  | 0.017975 | 1.609874 | O/U         |
| S-Methyl-5'-thioadenosine                   | 4.329962  | 0.031500 | 1.590671 | B           |
| Up-regulated in ARH (positive ion mode)     |           |          |          |             |
| 7,8-Dihydroneopterin                        | 6.752190  | 0.022732 | 1.490629 | O/U         |
| 7-(4-Hydroxyphenyl)-1-phenyl-4-hepten-3-one | 3.549869  | 0.001514 | 1.802306 | D&J         |
| Tryptophyl-Lysine                           | 2.215550  | 0.020954 | 1.485630 | B&F         |
| Pinolenic Acid                              | 2.142835  | 0.000921 | 1.801695 | O/U         |
| Histidinyl-Histidine                        | 1.806271  | 0.048940 | 1.270510 | B&F         |
| Pro His Val Ile                             | 1.772776  | 0.009542 | 1.606496 | B&F         |
| L-alpha-Glutamyl-L-tyrosine                 | 1.745868  | 0.011273 | 1.579769 | B&F         |
| Phenylalanyl-Asparagine                     | 1.533122  | 0.000226 | 1.898340 | B&F         |
| Flavanone                                   | 1.439437  | 0.031369 | 1.470842 | A&D&E&K&J&L |
| Adenylsuccinic acid                         | 1.408723  | 0.035745 | 1.382200 | O/U         |
| Up-regulated in ARH (negative ion mode)     |           |          |          |             |
| Manumycin A                                 | 4.692444  | 0.010880 | 1.804963 | D&J         |

|                            |          |          |          |     |
|----------------------------|----------|----------|----------|-----|
| (±)Absciscic Acid          | 1.768652 | 0.026070 | 1.661566 | O/U |
| Aloin A                    | 1.491532 | 0.000937 | 2.018043 | C   |
| PGF1a                      | 1.424410 | 0.018539 | 1.642573 | A&H |
| Malic acid                 | 1.194999 | 0.001120 | 2.036700 | C   |
| 2-hydroxyhexadecanoic acid | 0.984053 | 0.043788 | 1.321637 | O/U |
| D-Glycerate 2-phosphate    | 0.914763 | 0.004375 | 1.846519 | O/U |
| Fluoxetine                 | 0.845488 | 0.011991 | 1.780673 | I   |
| Succinic acid              | 0.705385 | 0.018459 | 1.707086 | C   |
| L-Malic acid               | 0.310647 | 0.000020 | 2.177900 | C   |

Note: The Capital letters represent the efficacy items of metabolites, which are as follows: A, Hemodynamic improvement; B, Efficient nutritional supplement; C, Hemostasis; D, Antibacterial; E, Anti-inflammatory; F, Short peptide-based regulation; G, Hepatoprotection; H, Hormone regulation; I, Neuromodulation, neuroprotection and tranquilization; J, Anti-tumor; K, Antioxidation; L, Antiviral. The ‘O/U’ was used to indicate other or unclear efficacies.

**Tab. S5** Metabolites (positive ion mode) in ART with superior content over both ARH and ARB, and annotation of their efficacy.

| Metabolites                                                 | ARH vs. ART         |          | ARB vs. ART         |          | Efficacies |
|-------------------------------------------------------------|---------------------|----------|---------------------|----------|------------|
|                                                             | log <sub>2</sub> FC | <i>P</i> | log <sub>2</sub> FC | <i>P</i> |            |
| Corchorusoside E                                            | 28.69               | 0.00110  | 20.76               | 0.00114  | A          |
| Ile Val Val Phe                                             | 28.42               | 0.00616  | 19.42               | 0.00898  | B&F        |
| 6-pentadecyl Salicylic Acid                                 | 26.59               | 0.01157  | 19.11               | 0.01229  | A&D        |
| pos_7956 (potential structural analogues of corticosterone) | 26.03               | 0.00035  | 18.89               | 0.00035  | H          |
| His His Arg Lys                                             | 27.95               | 0.00071  | 15.35               | 0.00055  | B&F        |
| pos_8029 (potential structural analogue of U-73122)         | 29.62               | 0.00001  | 12.60               | 0.00001  | A&J        |
| Amygdalin                                                   | 17.82               | 0.02832  | 11.00               | 0.00115  | A&E&J      |
| O-Phospho-L-threonine                                       | 16.82               | 0.00012  | 9.51                | 0.00004  | B          |

|                                                            |       |         |       |         |         |
|------------------------------------------------------------|-------|---------|-------|---------|---------|
| p-Cymene                                                   | 13.03 | 0.04011 | 9.58  | 0.04366 | O/U     |
| 5'-Prenyllicodione                                         | 11.71 | 0.00004 | 10.62 | 0.00002 | O/U     |
| Tyr His Tyr Gly                                            | 15.19 | 0.00635 | 6.58  | 0.01478 | B&F     |
| pos_7365 (potential structural analogue of sulfasalazine)  | 18.89 | 0.00146 | 2.43  | 0.00430 | D&E     |
| Cyclo(D-a-aspartyl-L-prolyl-D-valyl-L-leucyl-D-tryptophyl) | 13.62 | 0.01091 | 4.20  | 0.01412 | A       |
| myriocin (from medicinal plant-microbial ecosystem)        | 10.81 | 0.03330 | 6.31  | 0.04253 | A&D&E&L |
| 4-Isopropylbenzyl alcohol                                  | 10.40 | 0.01018 | 6.44  | 0.01228 | D&E     |
| Trans-Zeatin                                               | 13.89 | 0.00561 | 1.71  | 0.01146 | O/U     |
| pos_6076 (structural analogue of atorvastatin)             | 12.24 | 0.00000 | 3.31  | 0.00000 | A       |
| Amlodipine                                                 | 9.97  | 0.00074 | 5.32  | 0.02297 | A       |
| Glu His Ala Ser                                            | 5.29  | 0.00304 | 7.79  | 0.00331 | B&F     |
| Estriol 16.alpha.-(.beta.-D-glucuronide)                   | 10.68 | 0.00893 | 2.01  | 0.01080 | A&H     |
| Sesaminol glucoside                                        | 2.11  | 0.02312 | 10.20 | 0.02406 | D       |
| Marmesin rhamnoside                                        | 7.55  | 0.00434 | 3.58  | 0.00479 | A&K     |
| 1,3,5(10)-Estratrien-3,17.beta.-diol 17-glucosiduronate    | 6.30  | 0.00001 | 4.65  | 0.00005 | H       |
| Populin                                                    | 8.18  | 0.00000 | 2.10  | 0.01052 | O/U     |
| Phenacetine                                                | 6.89  | 0.00240 | 3.17  | 0.00261 | O/U     |
| Gamma-Tocopherol                                           | 7.17  | 0.00004 | 2.73  | 0.00002 | A       |
| Methionyl-Methionine                                       | 7.83  | 0.00000 | 2.04  | 0.00486 | K       |
| Prenyl arabinosyl-(1->6)-glucoside                         | 7.44  | 0.00005 | 2.35  | 0.00006 | D       |
| (Z)-1,5-Tridecadiene                                       | 2.03  | 0.02668 | 5.88  | 0.02341 | D       |

|                                         |      |         |      |         |         |
|-----------------------------------------|------|---------|------|---------|---------|
| 17-beta-Estradiol-3-glucuronide         | 3.89 | 0.00006 | 3.56 | 0.00007 | H       |
| 11beta-hydroxy-androst-4-ene-3,17-dione | 4.76 | 0.00369 | 2.47 | 0.00786 | H       |
| Aristolindiquinone                      | 4.46 | 0.00442 | 2.72 | 0.00744 | O/U     |
| 15-deoxy- $\delta$ -12,14-PGJ2          | 4.16 | 0.01206 | 2.73 | 0.02138 | O/U     |
| 8-8'-Dehydrodiferulic acid              | 3.91 | 0.00819 | 2.98 | 0.01056 | A&E&J   |
| Licoleafol                              | 4.38 | 0.00006 | 2.37 | 0.00005 | A&E&K   |
| 2,6-Dimethoxyquinone                    | 3.68 | 0.00079 | 3.05 | 0.00090 | A&D&E&J |
| Rhodinyl phenylacetate                  | 3.89 | 0.01270 | 2.65 | 0.01894 | H       |
| Tobramycin                              | 3.39 | 0.00147 | 2.99 | 0.00001 | D       |
| Ile His Met Thr                         | 4.08 | 0.01408 | 2.13 | 0.01092 | B&F     |
| Isosafrole                              | 3.63 | 0.00032 | 2.39 | 0.00153 | O/U     |
| 2,3-dihydrobenzofuran                   | 3.46 | 0.00187 | 2.18 | 0.00360 | O/U     |
| Anisomycin                              | 3.71 | 0.00172 | 1.59 | 0.01186 | D       |
| Asp Asp His Ala                         | 3.33 | 0.00081 | 1.80 | 0.00211 | B&F     |
| Asp His Gly Gly                         | 3.19 | 0.00150 | 1.88 | 0.00299 | B&F     |
| Asparaginy-Alanine                      | 2.69 | 0.00697 | 2.28 | 0.00297 | B&F     |
| 7-Ethoxy-4-methyl-2H-1-benzopyran-2-one | 2.45 | 0.00006 | 2.20 | 0.00024 | O/U     |
| Valyl-Aspartate                         | 2.76 | 0.00022 | 1.88 | 0.00025 | B&F     |
| Arachidonic Acid (peroxide free)        | 2.94 | 0.00000 | 1.68 | 0.00000 | A&J     |
| alpha-curcumene                         | 3.39 | 0.00242 | 1.06 | 0.04074 | A       |
| Val Leu Leu Cys                         | 2.46 | 0.00038 | 1.98 | 0.00069 | B&F     |
| 4-Methylesculetin                       | 2.71 | 0.00492 | 1.70 | 0.01154 | E&K     |
| Isoeugenyl acetate                      | 2.88 | 0.00000 | 1.38 | 0.03127 | O/U     |
| Glu Asn Asp His                         | 2.72 | 0.00076 | 1.45 | 0.00185 | B&F     |

|                                                                   |      |         |      |         |           |
|-------------------------------------------------------------------|------|---------|------|---------|-----------|
| (2RS,5RS)-(E)-2-(2-Phenylethenyl)-1,3-dioxan-5-ol                 | 2.80 | 0.00000 | 1.31 | 0.00473 | E         |
| 2'-Deoxyuridine                                                   | 2.12 | 0.02143 | 1.78 | 0.03224 | O/U       |
| Methylisoeugenol                                                  | 2.51 | 0.00001 | 1.31 | 0.02216 | O/U       |
| 18alpha.-Glycyrrhetic acid                                        | 2.26 | 0.00992 | 1.56 | 0.01867 | D&E&J&K&L |
| 3-O-Mycarosylerythronolide B                                      | 2.15 | 0.00026 | 1.56 | 0.00000 | D         |
| p-Cresol                                                          | 2.11 | 0.00191 | 1.56 | 0.00100 | A         |
| Eicosapentaenoic acid                                             | 2.56 | 0.00017 | 1.07 | 0.00090 | A         |
| Methyl-2-alpha-L-fucopyranosyl-beta-D-galactoside                 | 1.79 | 0.00502 | 1.74 | 0.00161 | D&E&L     |
| Cortisone acetate                                                 | 1.93 | 0.00511 | 1.59 | 0.00751 | E         |
| Pentazocine                                                       | 2.47 | 0.00142 | 1.05 | 0.02766 | O/U       |
| 5(S),6(R),15(R)-Lipoxin A4                                        | 1.34 | 0.00742 | 2.12 | 0.00129 | E         |
| Cys Asn Met Tyr                                                   | 1.88 | 0.00097 | 1.56 | 0.00185 | B&F       |
| (±)-Warfarin                                                      | 1.67 | 0.00895 | 1.68 | 0.00001 | A         |
| Nystatin                                                          | 1.57 | 0.01099 | 1.77 | 0.00864 | D         |
| Potassium sorbate                                                 | 1.87 | 0.00003 | 1.39 | 0.00134 | O/U       |
| 21-hydroxyallopregnanolone                                        | 1.78 | 0.01128 | 1.47 | 0.01716 | H         |
| 6,10-Dimethyl-5(E),9-undecadien-2-one                             | 1.43 | 0.01968 | 1.52 | 0.02054 | O/U       |
| β -Phenyl-gamma-Aminobutyric Acid                                 | 1.07 | 0.02953 | 1.64 | 0.03156 | A&I       |
| 8E,10E-Tetradecadienal                                            | 1.32 | 0.02121 | 1.38 | 0.02187 | O/U       |
| 2-Isopropenyl-4a,8-dimethyl-1,2,3,4,4a,5,6,7-octahydronaphthalene | 1.57 | 0.00227 | 1.10 | 0.00615 | O/U       |
| Caproic acid                                                      | 1.18 | 0.03797 | 1.46 | 0.02849 | O/U       |

|                                                  |      |         |      |         |     |
|--------------------------------------------------|------|---------|------|---------|-----|
| MGDG(18:3(9Z,12Z,15Z)/18:3(9Z,12Z,15Z))          | 1.43 | 0.00660 | 1.12 | 0.01322 | O/U |
| 3-Phenylpropanoic acid                           | 1.20 | 0.00198 | 1.26 | 0.00139 | O/U |
| 5,7-Diethyl-9-methyl-3E,5E,7E,9E-tridecatetraene | 1.14 | 0.01774 | 1.22 | 0.01800 | O/U |
| Farnesyl acetone                                 | 1.15 | 0.01416 | 1.20 | 0.01541 | O/U |
| D-Pinitol                                        | 1.13 | 0.01566 | 1.22 | 0.02773 | O/U |

Note: The Capital letters represent the efficacy items of metabolites, which are as follows: A, Hemodynamic improvement; B, Efficient nutritional supplement; C, Hemostasis; D, Antibacterial; E, Anti-inflammatory; F, Short peptide-based regulation; G, Hepatoprotection; H, Hormone regulation; I, Neuromodulation, neuroprotection and tranquilization; J, Anti-tumor; K, Antioxidation; L, Antiviral. The ‘O/U’ was used to indicate other or unclear efficacies.

**Tab. S6** Metabolites (negative ion mode) in ART with superior content over both ARH and ARB, and annotation of their efficacy.

| Metabolites                 | ARH vs. ART         |         | ARB vs. ART         |         | Efficacies |
|-----------------------------|---------------------|---------|---------------------|---------|------------|
|                             | log <sub>2</sub> FC | P       | log <sub>2</sub> FC | P       |            |
| Genkwanin                   | 18.01               | 0.00535 | 20.77               | 0.00550 | E          |
| Levofloxacin                | 21.12               | 0.01069 | 14.11               | 0.01160 | D          |
| (±)7-epi Jasmonic Acid      | 24.06               | 0.01934 | 10.48               | 0.02147 | O/U        |
| Flavin mononucleotide (FMN) | 15.44               | 0.02362 | 17.96               | 0.02380 | O/U        |
| 2'-O-methylguanosine        | 16.48               | 0.00000 | 13.58               | 0.00000 | O/U        |
| Zidovudine                  | 18.52               | 0.00033 | 10.75               | 0.00021 | L          |
| 7-Methylguanosine           | 16.32               | 0.00016 | 12.58               | 0.00168 | O/U        |
| Bosentan                    | 17.15               | 0.00034 | 9.31                | 0.00557 | A          |
| Lisinopril                  | 16.84               | 0.00003 | 9.35                | 0.00005 | A          |
| Homocitrate                 | 16.79               | 0.00000 | 8.83                | 0.00028 | A          |
| Sappanone A Dimethyl Ether  | 18.38               | 0.00000 | 6.72                | 0.00000 | E&I&K      |
| N2,N2-Dimethylguanosine     | 16.10               | 0.00005 | 8.79                | 0.00013 | O/U        |
| L-Anserine                  | 13.06               | 0.02006 | 8.92                | 0.02370 | A&I        |
| Ile-Ala-Arg                 | 14.82               | 0.00711 | 4.07                | 0.00860 | B&F        |

|                                         |       |         |      |         |               |
|-----------------------------------------|-------|---------|------|---------|---------------|
| Zingerone                               | 12.89 | 0.00001 | 4.95 | 0.02636 | A&D&G<br>&I&K |
| Valeroyl Salicylate                     | 8.34  | 0.01593 | 7.77 | 0.01046 | O/U           |
| Adenine                                 | 12.39 | 0.00003 | 3.53 | 0.00001 | B             |
| 3-Methyluridine                         | 11.67 | 0.00012 | 3.82 | 0.00016 | O/U           |
| Phenylalanyl-Histidine                  | 10.51 | 0.01332 | 3.37 | 0.00400 | B&F           |
| cis-9-Palmitoleic acid                  | 5.83  | 0.00615 | 6.14 | 0.00534 | A&D&E         |
| Deoxysappanone B<br>7,3'-Dimethyl Ether | 9.22  | 0.01220 | 1.81 | 0.00248 | A&E&I         |
| 9(S)-HOTrE                              | 7.52  | 0.00560 | 2.97 | 0.00778 | O/U           |
| Isoleucyl-Lysine                        | 3.05  | 0.00385 | 6.66 | 0.00335 | B&F           |
| Indole-3-acetamide                      | 8.72  | 0.00825 | 0.71 | 0.01016 | O/U           |
| Asn-Trp-OH                              | 4.88  | 0.00000 | 4.43 | 0.00000 | B&F           |
| S-Methyl-5'-thioadenosine               | 6.66  | 0.00130 | 2.33 | 0.00270 | O/U           |
| myo-Inositol                            | 2.60  | 0.00163 | 5.32 | 0.00214 | A             |
| 5-Methyltetrahydrofolate (5-Methyl-THF) | 5.31  | 0.01889 | 2.34 | 0.00078 | A&B&I&J<br>&K |
| Glycyl-Tyrosine                         | 4.08  | 0.00001 | 2.66 | 0.00002 | B&F           |
| Leucyl-Glutamate                        | 5.79  | 0.00105 | 0.81 | 0.01828 | B&F           |
| 9(S)-HpOTrE                             | 3.61  | 0.01023 | 2.93 | 0.01375 | A             |
| Raffinose                               | 3.84  | 0.00000 | 2.63 | 0.00000 | O/U           |
| TyrMe-Asp-OH                            | 4.79  | 0.00007 | 1.68 | 0.00021 | B&F           |
| Scytalone                               | 4.13  | 0.00145 | 2.07 | 0.00478 | O/U           |
| Butabarbital                            | 3.15  | 0.01163 | 2.55 | 0.01015 | I             |
| Vidarabine                              | 3.27  | 0.00004 | 2.40 | 0.00002 | L             |
| Tyrosyl-Serine                          | 3.68  | 0.00019 | 1.82 | 0.00296 | B&F           |
| Lysyl-Serine                            | 4.15  | 0.00003 | 1.28 | 0.00135 | B&F           |
| Acadesine (Drug)                        | 3.87  | 0.01246 | 1.50 | 0.04438 | A&E           |
| (-)-Riboflavin                          | 3.69  | 0.00302 | 1.52 | 0.01577 | K             |
| HoPhe-HoPhe-OH                          | 2.67  | 0.00409 | 2.35 | 0.00487 | B&F           |
| Acetyl-L-tyrosine                       | 2.52  | 0.00043 | 2.37 | 0.00228 | O/U           |

|                          |      |         |      |         |             |
|--------------------------|------|---------|------|---------|-------------|
| D-Glucono-1,5-lactone    | 2.51 | 0.02802 | 2.14 | 0.04404 | K           |
| Glutathione              | 3.03 | 0.00123 | 1.58 | 0.00313 | K           |
| Uridine 5'-monophosphate | 2.71 | 0.00004 | 1.75 | 0.00011 | O/U         |
| Tyrosyl-Phenylalanine    | 2.79 | 0.00006 | 1.45 | 0.00026 | A           |
| Lawsone                  | 2.61 | 0.00023 | 1.50 | 0.00617 | D&K         |
| Coumarin                 | 2.41 | 0.00069 | 1.40 | 0.01057 | E&J&K       |
| Protionamide             | 2.08 | 0.00170 | 1.71 | 0.00316 | D           |
| Sinensetin               | 2.58 | 0.00558 | 1.06 | 0.00042 | A&D&E&J&K&L |
| Oxoglutaric acid         | 2.47 | 0.00000 | 1.16 | 0.00001 | B           |
| PG(18_2(9Z,12Z)_18_0)    | 2.17 | 0.00334 | 1.43 | 0.00972 | O/U         |
| Phenylalanyl-Tryptophan  | 2.42 | 0.00015 | 1.13 | 0.00016 | B&F         |
| Streptozocin             | 1.72 | 0.00119 | 1.67 | 0.00290 | D           |
| Salidroside              | 2.11 | 0.00438 | 1.07 | 0.03132 | A&J         |
| Glycerol 3-phosphate     | 1.48 | 0.02321 | 1.59 | 0.03384 | O/U         |
| Doxycycline              | 1.79 | 0.00152 | 1.11 | 0.00463 | D           |
| D-Neopterin              | 1.48 | 0.00110 | 1.37 | 0.00127 | E&K         |
| 16b-Hydroxyestradiol     | 1.67 | 0.00011 | 1.11 | 0.01033 | H           |
| Ketoprofen               | 1.23 | 0.02104 | 1.10 | 0.01462 | E           |
| Naringin                 | 1.13 | 0.00678 | 1.19 | 0.01057 | A&J&K       |

Note: The Capital letters represent the efficacy items of metabolites, which are as follows: A, Hemodynamic improvement; B, Efficient nutritional supplement; C, Hemostasis; D, Antibacterial; E, Anti-inflammatory; F, Short peptide-based regulation; G, Hepatoprotection; H, Hormone regulation; I, Neuromodulation, neuroprotection and tranquilization; J, Anti-tumor; K, Antioxidation; L, Antiviral. The 'O/U' was used to indicate other or unclear efficacies.



**Tab. S7** Metabolites (positive ion mode) in ARH and ARB with superior content over ART, and annotation of their efficacy.

| Metabolites                             | ART vs. ARH         |          | ART vs. ARB         |          | Efficacies |
|-----------------------------------------|---------------------|----------|---------------------|----------|------------|
|                                         | log <sub>2</sub> FC | <i>P</i> | log <sub>2</sub> FC | <i>P</i> |            |
| Virginiamycin S1                        | 24.39               | 0.01314  | 23.86               | 0.01913  | D          |
| L-alpha-Glutamyl-L-tyrosine             | 12.82               | 0.00170  | 11.08               | 0.01271  | B&I        |
| Tryptamine                              | 7.21                | 0.00000  | 7.25                | 0.00540  | C&I        |
| Nalpha-Methylhistidine                  | 6.84                | 0.01951  | 6.45                | 0.02354  | K          |
| DL-Arginine                             | 4.57                | 0.00036  | 4.30                | 0.00339  | C&B&G      |
| Lys Ser Gly                             | 4.84                | 0.00065  | 3.76                | 0.00935  | B          |
| Homatropine                             | 3.60                | 0.00014  | 3.28                | 0.00216  | O/U        |
| L-Arginine                              | 3.13                | 0.00023  | 3.09                | 0.00000  | B&C&G      |
| D-Lysine                                | 3.52                | 0.00210  | 2.55                | 0.04702  | B&C        |
| N-Trimethyl-2-aminoethylphosphonate     | 2.84                | 0.00244  | 2.89                | 0.00449  | G          |
| Kynurenic acid                          | 3.21                | 0.00004  | 2.45                | 0.00800  | I          |
| L-Isoleucine                            | 3.16                | 0.00108  | 2.38                | 0.03433  | B          |
| Citrulline                              | 2.67                | 0.00003  | 2.37                | 0.00430  | B&G        |
| L-Proline                               | 2.30                | 0.00004  | 2.09                | 0.00127  | B          |
| 1-Palmitoyl-sn-glycero-3-phosphocholine | 1.95                | 0.02481  | 2.01                | 0.00245  | G          |
| Sepiapterin                             | 2.50                | 0.00120  | 1.41                | 0.03252  | C          |
| Ser Glu His Thr                         | 2.25                | 0.00003  | 1.32                | 0.03663  | B&F        |
| V-Pyrro/No                              | 1.80                | 0.00000  | 1.60                | 0.00042  | O/U        |
| CDP-Ethanolamine                        | 1.91                | 0.01827  | 1.47                | 0.01011  | O/U        |
| Trp Gly Phe                             | 1.68                | 0.00018  | 1.67                | 0.04182  | B&F        |
| 5-Methoxyindoleacetate                  | 1.80                | 0.00195  | 1.55                | 0.01005  | I          |

|                                  |      |         |      |         |       |
|----------------------------------|------|---------|------|---------|-------|
| 1-O-Feruloyl- $\beta$ -D-glucose | 1.91 | 0.01201 | 1.41 | 0.02015 | E&K   |
| 11-Deoxycortisol                 | 2.09 | 0.00604 | 1.12 | 0.02914 | H     |
| Citrinin                         | 1.81 | 0.00147 | 1.36 | 0.03481 | D&I&J |
| 1-Linoleoylglycerophosphocholine | 1.78 | 0.00004 | 1.35 | 0.00833 | B     |
| LysoPE(18:2(9Z,12Z)/0:0)         | 1.80 | 0.00017 | 1.23 | 0.00796 | O/U   |
| Phytosphingosine                 | 1.61 | 0.03593 | 1.15 | 0.00010 | J     |
| Benzyl acetate                   | 1.66 | 0.00003 | 1.00 | 0.03051 | O/U   |
| PE(17:0/0:0)                     | 1.48 | 0.01305 | 1.18 | 0.00199 | O/U   |
| 3-Methyloxindole                 | 1.29 | 0.00001 | 1.21 | 0.03420 | O/U   |
| LysoPE(15:0/0:0)                 | 1.49 | 0.01420 | 1.01 | 0.00599 | O/U   |
| 5-O-Methylsteroidol              | 1.39 | 0.02530 | 1.04 | 0.00928 | O/U   |
| Isoquinoline N-oxide             | 1.21 | 0.00000 | 1.08 | 0.02299 | O/U   |
| Tacrine                          | 1.09 | 0.02060 | 1.10 | 0.00372 | I     |

Note: The Capital letters represent the efficacy items of metabolites, which are as follows: A, Hemodynamic improvement; B, Efficient nutritional supplement; C, Hemostasis; D, Antibacterial; E, Anti-inflammatory; F, Short peptide-based regulation; G, Hepatoprotection; H, Hormone regulation; I, Neuromodulation, neuroprotection and tranquilization; J, Anti-tumor; K, Antioxidation; L, Antiviral. The ‘O/U’ was used to indicate other or unclear efficacies.

**Tab. S8** Metabolites (negative ion mode) in ARH and ARB with superior content over ART, and annotation of their efficacy

| Metabolites                                 | ART vs. ARH         |          | ART vs. ARB         |          | Efficacies  |
|---------------------------------------------|---------------------|----------|---------------------|----------|-------------|
|                                             | log <sub>2</sub> FC | <i>P</i> | log <sub>2</sub> FC | <i>P</i> |             |
| L-Citrulline                                | 17.06               | 0.02132  | 18.05               | 0.00825  | B           |
| D-Glycerate 2-phosphate                     | 10.94               | 0.00005  | 10.03               | 0.00125  | O/U         |
| Salannin                                    | 11.12               | 0.04029  | 8.56                | 0.04372  | D&J&L       |
| (±)Absciscic Acid                           | 7.92                | 0.00829  | 6.15                | 0.00842  | O/U         |
| L-Lysine monohydrochloride                  | 2.88                | 0.00109  | 2.25                | 0.03435  | B&C         |
| Nicotinamide adenine dinucleotide (NAD)     | 2.72                | 0.00158  | 2.34                | 0.01826  | B&C         |
| 2,5-Dihydroxybenzoic acid                   | 2.02                | 0.04328  | 2.38                | 0.00680  | O/U         |
| 17-Octadecynoic Acid                        | 2.25                | 0.00026  | 1.63                | 0.02503  | A           |
| N-Acetyl-D-lactosamine                      | 2.09                | 0.00114  | 1.57                | 0.00783  | B           |
| 7,8-Dihydrofolate                           | 1.88                | 0.00208  | 1.56                | 0.00111  | A&B&I&K&J   |
| Folinic acid                                | 1.66                | 0.00542  | 1.52                | 0.01086  | B&D&E&J&L   |
| S-(1,2-Dicarboxyethyl)Glutathione           | 1.65                | 0.01148  | 1.51                | 0.00041  | B&G&K       |
| Tryptophyl-Glutamate                        | 1.94                | 0.00706  | 1.13                | 0.04517  | B&F         |
| 4-O-.beta.-Galactopyranosyl-D-mannopyranose | 1.61                | 0.01616  | 1.29                | 0.00317  | B           |
| alpha-Mangostin                             | 1.46                | 0.01660  | 1.40                | 0.00353  | B&D&E&J&K&L |
| Pyridoxamine 5'-phosphate                   | 1.40                | 0.00790  | 1.13                | 0.00910  | B&K         |
| L-Tyrosine                                  | 1.36                | 0.00114  | 1.07                | 0.02254  | B           |
| L-Tryptophan                                | 1.11                | 0.00126  | 1.29                | 0.02417  | B&I         |
| PE(18_1(9Z)_0_0)                            | 1.19                | 0.00065  | 1.18                | 0.00000  | O/U         |
| Indole                                      | 1.01                | 0.00029  | 1.07                | 0.03895  | E           |

Note: The Capital letters represent the efficacy items of metabolites, which are as follows: A, Hemodynamic improvement; B, Efficient nutritional supplement; C, Hemostasis; D, Antibacterial; E, Anti-inflammatory; F, Short peptide-based regulation; G, Hepatoprotection; H, Hormone regulation; I, Neuromodulation, neuroprotection and tranquilization; J, Anti-tumor; K, Antioxidation; L, Antiviral. The 'O/U' indicated other or unclear efficacies. The 'O/U' was used to indicate other or unclear efficacies.

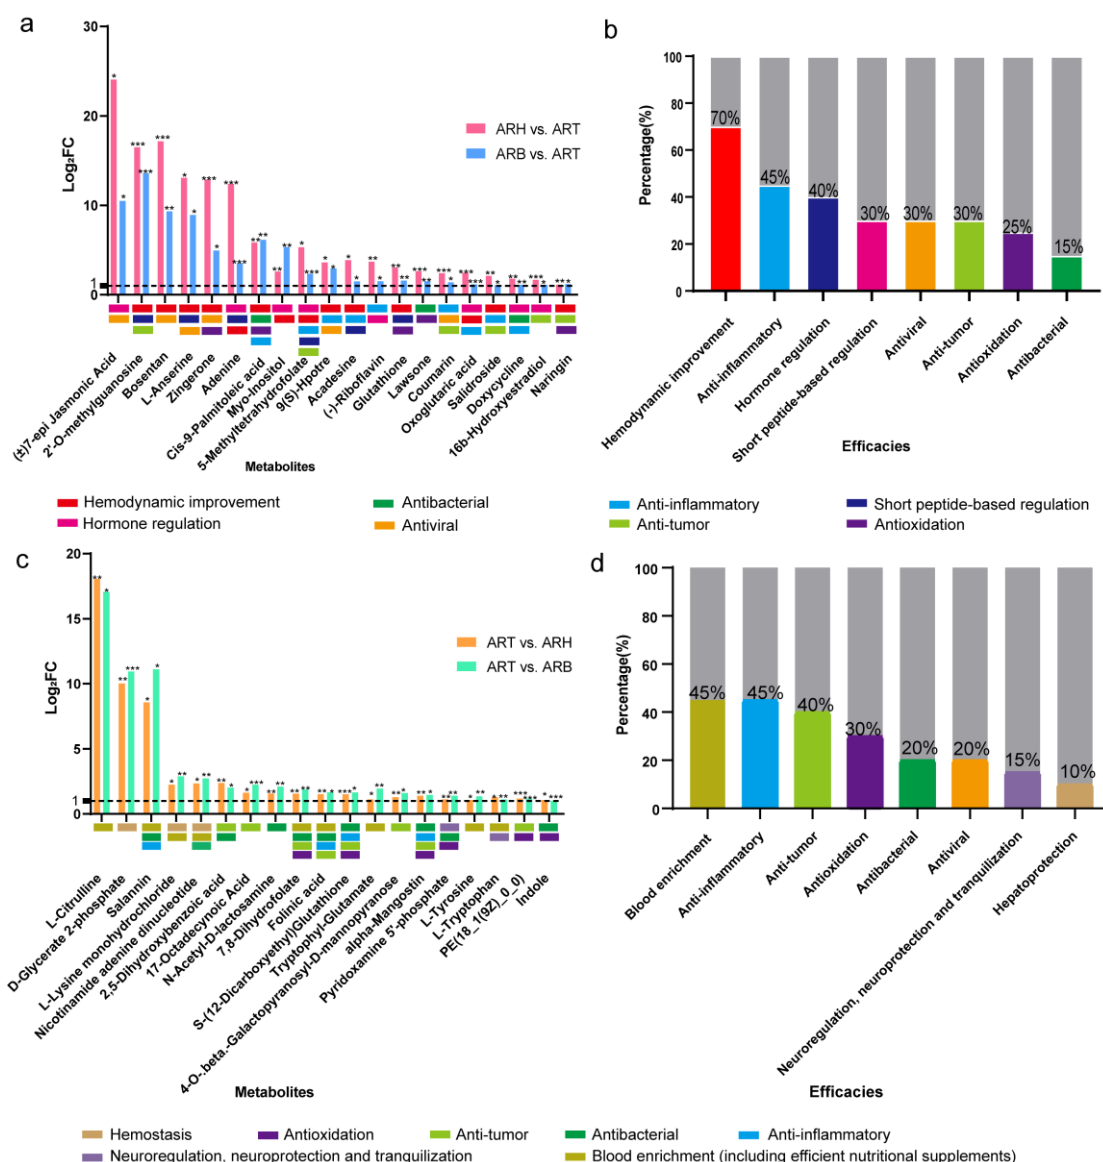

**Fig. S4** Dominant metabolites (negative ion mode) and corresponding medicinal efficacy patterns in different medicinal parts of Ang root. a and b, The top metabolites in ART with higher contents than those in both ARH and ARB and an analysis of their medicinal efficacy patterns. c and d, Top metabolites in both ARH and ARB with higher contents than those in ART and an analysis of their medicinal efficacy patterns. The \*, \*\*, and \*\*\* denote  $p < 0.1$ ,  $p < 0.05$  and  $p < 0.01$ , respectively.

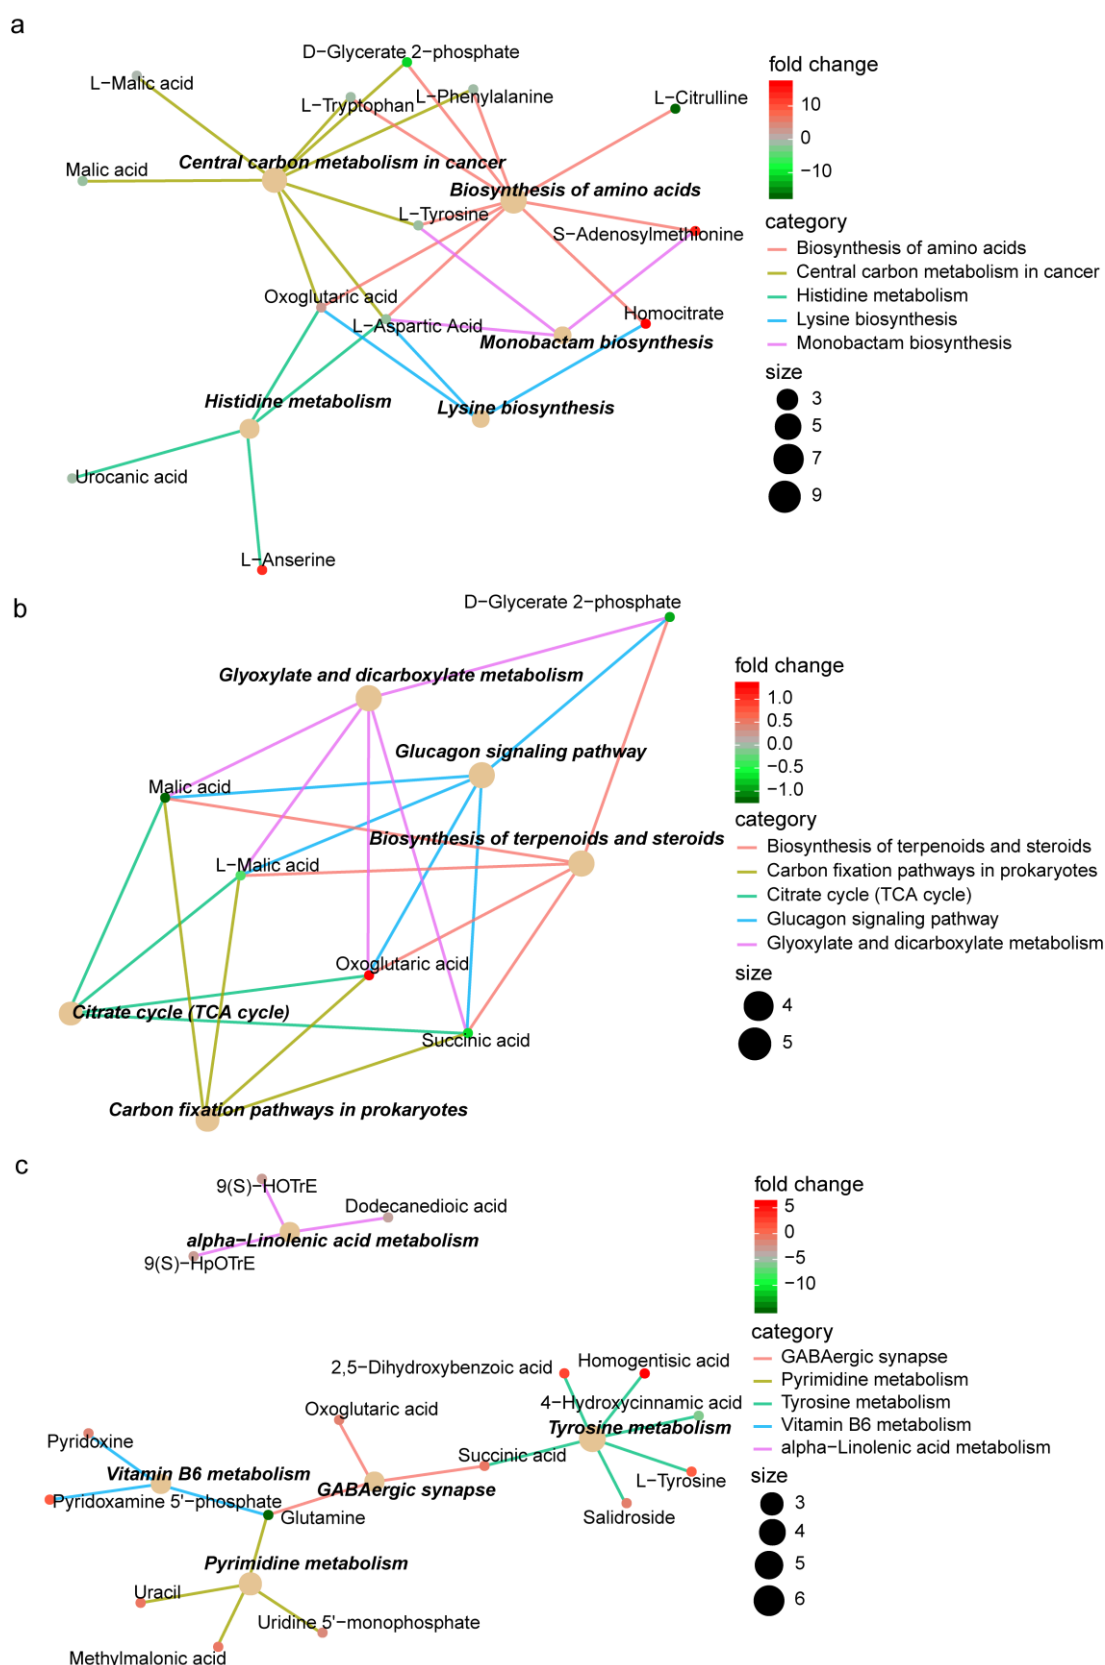

**Fig. S5** KEGG enrichment analysis of the differential metabolites (negative ion mode) obtained from the different medicinal parts. a, b, and c correspond to ARH vs. ART, ARH vs. ARB, and ART vs. ARB, respectively.

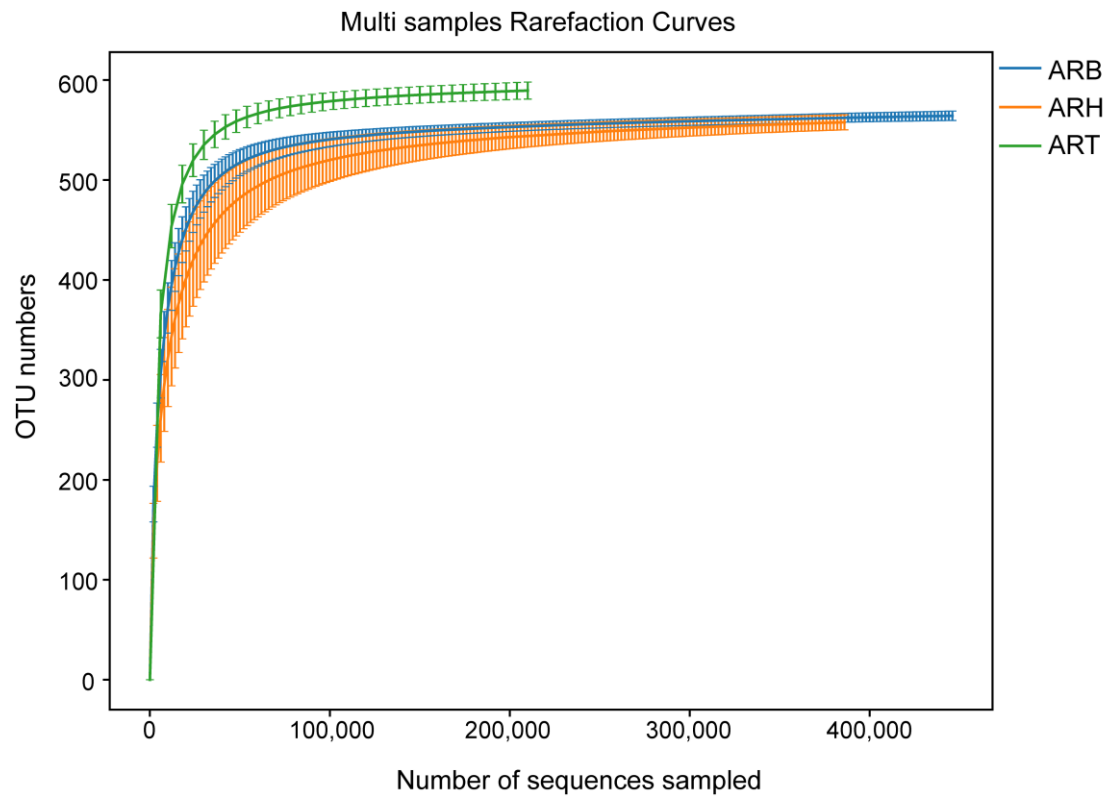

**Fig.S6** Relationships between the ITS sequence numbers and the OTU numbers in the microbiome analyses for the different medicinal parts of Ang root. At the sequencing depth used in this study, the number of OTU tended to be flat, and the standard deviation was very small.

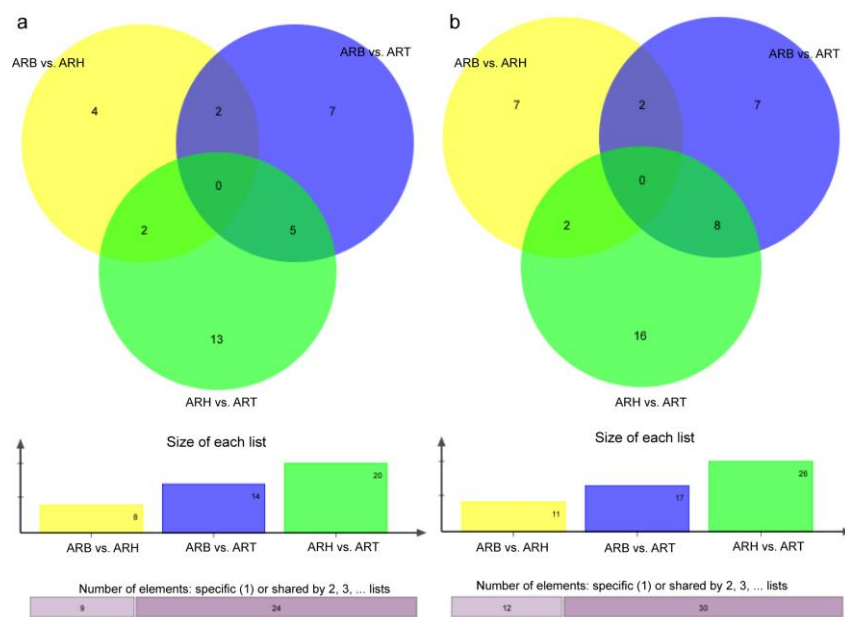

**Fig. S7** Venn diagram showing the endophytic fungi at the genus (a) and species (b) levels in different medicinal

parts of Ang root.

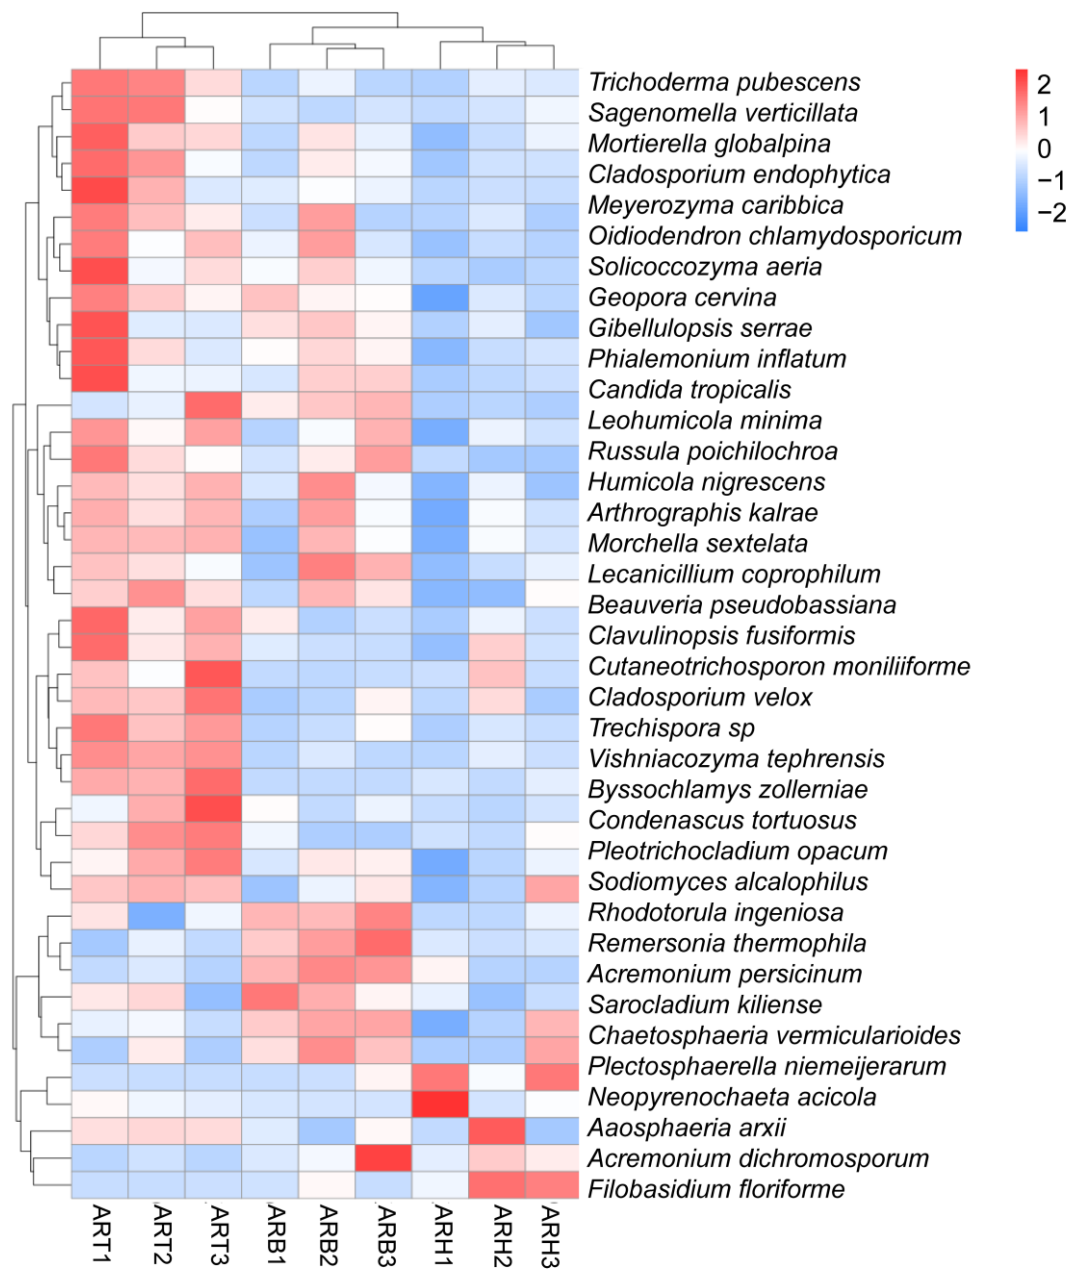

**Fig. S8** Hierarchical cluster analysis of the samples from the different medicinal parts based on the abundance data for endophytic fungi at the species level.





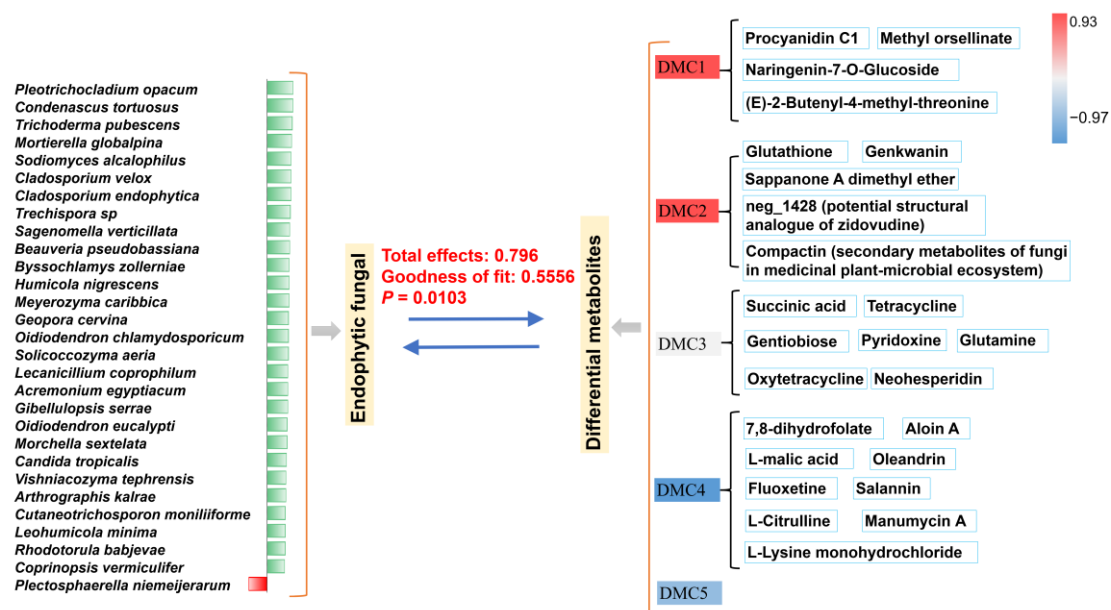

**Fig. S10** Structural equation model for the endophytic fungi (species level) and metabolites (negative ion mode) based on the differences among the medicinal parts of Ang root. The green bar chart shows the indication values for the differential species to the microbial module; the red-blue colour gradation shows the indicator values for the differential metabolite clusters to the metabolite module.
